# Supplementary material
Source: PubMed Central journal article supplement (PMC8262104)
Supplement: NIHMS1702869-supplement-JAM_supplement.pdf [file NIHMS1702869-supplement-JAM_supplement.pdf]

## SUPPLEMENTAL DIGITAL CONTENT

**eFigure 1.** Flowchart for generating the study dataset of medical inpatients

**eBox 1.** ICD-9-CM Diagnostic and Procedure Codes

**eTable 1.** Characteristics of medical inpatients in the Veterans Health Administration in FY2013 by prior-year history of AUD and/or AWS

**eTable 2.** Probability of AWS based on prior-year health characteristics among medical inpatients with and without prior-year AUD and/or AWS in the Veterans Health Administration in fiscal year 2013

This supplementary material has been provided by the authors to give readers additional information about their work.

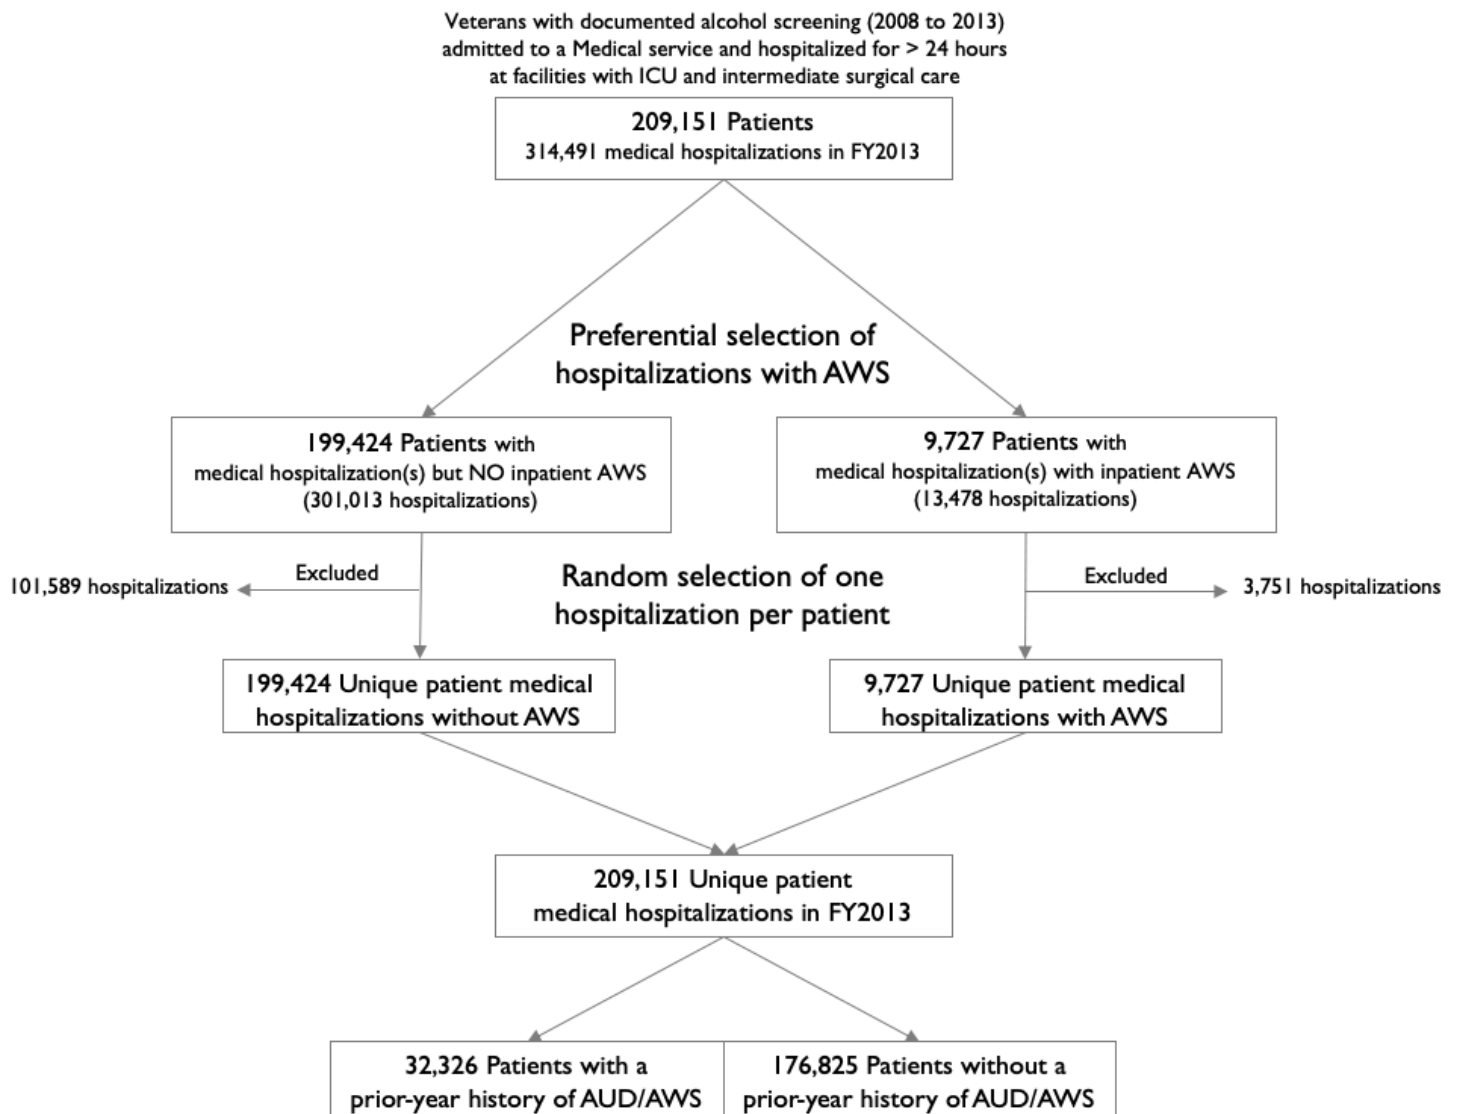

**eFigure 1. Flowchart for generating the dataset of medical inpatients engaged in care (determined by mandatory alcohol screening) in the Veterans Health Administration in FY2013, prioritizing admissions complicated by AWS**  
 ICU = intensive care unit, FY2013 = fiscal year 2013, AUD = alcohol use disorder, AWS = alcohol withdrawal syndrome

**eBox 1. ICD-9-CM Diagnostic and Procedure Codes**

Alcohol Withdrawal Syndrome:

- Diagnostic Codes: 291.0, 291.3, 291.5, 291.8, 291.81
- Procedure Codes: 94.62, 94.63, 94.68, 94.69

Alcohol Use Disorder:

- Diagnostic Codes: 303.x and 305.0x

**eTable I. Characteristics of medical inpatients in the Veterans Health Administration in FY2013 by prior-year history of AUD and/or AWS**

|                                                                 | Prior-year<br>AUD/AWS<br>(n = 32,326) |        | No prior-year<br>AUD/AWS<br>(n = 176,825) |        |
|-----------------------------------------------------------------|---------------------------------------|--------|-------------------------------------------|--------|
| Age years, mean (sd)                                            | 60.3                                  | (10.3) | 69.3                                      | (12.7) |
| Male, no. (%)                                                   | 31,335                                | (96.9) | 169,034                                   | (95.6) |
| Race, no. (%)                                                   |                                       |        |                                           |        |
| White                                                           | 20,364                                | (63.0) | 120,208                                   | (68.0) |
| Black                                                           | 8,328                                 | (25.8) | 33,904                                    | (19.2) |
| Hispanic/Latino                                                 | 1,511                                 | (4.7)  | 9,363                                     | (5.3)  |
| Other Race/Ethnicity                                            | 914                                   | (2.8)  | 4,785                                     | (2.7)  |
| Unknown                                                         | 1,209                                 | (3.7)  | 8,565                                     | (4.8)  |
| Single, no. (%)                                                 | 24,138                                | (74.7) | 95,950                                    | (54.3) |
| Homeless, no. (%)                                               | 8,270                                 | (25.6) | 7,196                                     | (4.1)  |
| Prior-year medical diagnoses, no. (%)                           |                                       |        |                                           |        |
| Pain-related                                                    | 24,231                                | (75.0) | 128,735                                   | (72.8) |
| Seizure                                                         | 2,923                                 | (9.0)  | 7,790                                     | (4.4)  |
| Cerebrovascular disease                                         | 3,827                                 | (11.8) | 28,781                                    | (16.3) |
| Dementia                                                        | 2,715                                 | (8.4)  | 18,526                                    | (10.5) |
| Heart failure                                                   | 4,950                                 | (15.3) | 42,943                                    | (24.3) |
| Chronic obstructive pulmonary disease                           | 10,740                                | (33.2) | 52,689                                    | (29.8) |
| Gastrointestinal disorder                                       | 4,391                                 | (13.6) | 14,407                                    | (8.2)  |
| Cirrhosis                                                       | 5,377                                 | (16.6) | 5,971                                     | (3.4)  |
| Chronic kidney disease                                          | 3,322                                 | (10.3) | 36,740                                    | (20.8) |
| Acute kidney injury <sup>a</sup>                                | 4,243                                 | (13.1) | 24,060                                    | (13.6) |
| Diabetes                                                        | 8,712                                 | (27.0) | 77,241                                    | (43.7) |
| Malignancy                                                      | 5,402                                 | (16.7) | 38,176                                    | (21.6) |
| Trauma                                                          | 9,348                                 | (28.9) | 38,042                                    | (21.5) |
| Pneumonia                                                       | 4,003                                 | (12.4) | 26,041                                    | (14.7) |
| Sepsis/shock <sup>a</sup>                                       | 4,026                                 | (12.5) | 22,027                                    | (12.5) |
| Prior-year AD, no. (%)                                          | 32,028                                | (99.1) | 0                                         | (0.0)  |
| Prior-year AWS, no (%)                                          | 6,905                                 | (21.4) | 0                                         | (0.0)  |
| Prior-year other substance use diagnosis <sup>b</sup> , no. (%) | 12,380                                | (38.3) | 7,912                                     | (4.5)  |
| Prior-year mental health diagnoses, no. (%)                     |                                       |        |                                           |        |
| Anxiety                                                         | 7,287                                 | (22.5) | 19,767                                    | (11.2) |
| Depression                                                      | 14,335                                | (44.4) | 42,210                                    | (23.9) |
| Post-traumatic stress disorder                                  | 8,835                                 | (27.3) | 21,309                                    | (12.1) |
| Bipolar disorder                                                | 3,324                                 | (10.3) | 5,068                                     | (2.9)  |
| Psychotic disorder                                              | 3,704                                 | (11.5) | 10,168                                    | (5.8)  |
| Prior-year outpatient care                                      |                                       |        |                                           |        |
| Emergency Department care                                       | 23,279                                | (72.0) | 107,763                                   | (60.9) |
| Primary care <sup>a</sup>                                       | 30,105                                | (93.1) | 164,407                                   | (93.0) |
| Specialty Medical/Surgical care                                 | 27,697                                | (85.7) | 158,161                                   | (89.4) |
| Mental Health/Substance use care                                | 22,718                                | (70.3) | 55,669                                    | (31.5) |
| Prior-year inpatient care                                       |                                       |        |                                           |        |
| Medical admission                                               | 15,586                                | (48.2) | 66,542                                    | (37.6) |
| Surgical admission <sup>a</sup>                                 | 2,597                                 | (8.0)  | 13,894                                    | (7.9)  |
| Mental health/Substance use admission                           | 5,311                                 | (16.4) | 2,469                                     | (1.4)  |

FY2013 = fiscal year 2013, AUD = alcohol use disorder, AWS = alcohol withdrawal syndrome

<sup>a</sup> Not statistically significant at the  $p < 0.001$  level

<sup>b</sup> Includes only drug use disorders

**eTable 2. Probability of AWS based on prior-year health characteristics among medical inpatients with and without prior-year AUD and/or AWS in the Veterans Health Administration in fiscal year 2013**

|                                     | Prior-year AUD/AWS <sup>a</sup><br>(n = 32,326) |           |             |             | No prior-year AUD/AWS <sup>a</sup><br>(n = 176,825) |           |            |           |
|-------------------------------------|-------------------------------------------------|-----------|-------------|-------------|-----------------------------------------------------|-----------|------------|-----------|
|                                     | OR                                              | (95% CI)  | Pred %      | (95% CI)    | OR                                                  | (95% CI)  | Pred %     | (95% CI)  |
| <b>Age</b>                          |                                                 |           |             |             |                                                     |           |            |           |
| < 40 years                          | -                                               | -         | 23.9        | (21.3-26.4) | -                                                   | -         | 0.6        | (0.4-0.9) |
| 40-49 years                         | <b>1.6</b>                                      | (1.4-1.9) | <b>32.0</b> | (29.5-34.5) | 1.4                                                 | (0.9-2.0) | 0.8        | (0.6-1.1) |
| 50-59 years                         | <b>1.3</b>                                      | (1.1-1.5) | <b>28.0</b> | (26.0-30.0) | 1.7                                                 | (1.2-2.4) | 1.1        | (0.9-1.2) |
| 60-69 years                         | 1.1                                             | (1.0-1.3) | 25.5        | (23.6-27.4) | 1.7                                                 | (1.2-2.3) | 1.0        | (0.9-1.2) |
| ≥ 70 years                          | 0.8                                             | (0.7-1.0) | 20.7        | (18.6-22.8) | 0.7                                                 | (0.5-1.0) | 0.4        | (0.4-0.5) |
| <b>Sex</b>                          |                                                 |           |             |             |                                                     |           |            |           |
| Female                              | <b>0.7</b>                                      | (0.6-0.8) | <b>21.5</b> | (18.7-24.2) | <b>0.3</b>                                          | (0.2-0.4) | <b>0.3</b> | (0.1-0.4) |
| <b>Race</b>                         |                                                 |           |             |             |                                                     |           |            |           |
| White                               | -                                               | -         | 28.3        | (26.3-30.2) | -                                                   | -         | 0.8        | (0.6-0.9) |
| Black                               | <b>0.7</b>                                      | (0.6-0.7) | <b>22.0</b> | (20.2-23.9) | 1.1                                                 | (0.9-1.3) | 0.9        | (0.7-1.0) |
| Hispanic/Latino                     | 0.9                                             | (0.8-1.0) | 26.2        | (23.3-29.2) | 1.1                                                 | (0.8-1.5) | 0.9        | (0.6-1.1) |
| Other Race/Ethnicity                | 0.9                                             | (0.8-1.1) | 26.3        | (23.3-29.6) | 0.8                                                 | (0.5-1.2) | 0.6        | (0.4-0.9) |
| Unknown                             | 0.8                                             | (0.7-0.9) | 21.4        | (21.5-27.3) | 1.1                                                 | (0.9-1.4) | 0.9        | (0.7-1.1) |
| <b>Single</b>                       |                                                 |           |             |             |                                                     |           |            |           |
| Homeless                            | <b>1.2</b>                                      | (1.1-1.3) | <b>27.1</b> | (25.2-28.9) | <b>1.8</b>                                          | (1.6-2.0) | <b>1.0</b> | (0.8-1.1) |
| <b>Prior-year medical diagnoses</b> |                                                 |           |             |             |                                                     |           |            |           |
| Pain-related                        | <b>0.7</b>                                      | (0.7-0.8) | <b>25.1</b> | (23.3-26.9) | <b>0.8</b>                                          | (0.7-0.9) | <b>0.7</b> | (0.6-0.9) |
| Seizure                             | <b>1.9</b>                                      | (1.7-2.1) | <b>36.4</b> | (33.8-39.0) | <b>2.0</b>                                          | (1.6-2.5) | <b>1.5</b> | (1.1-1.9) |
| Cerebrovascular disease             | <b>0.6</b>                                      | (0.6-0.7) | <b>20.6</b> | (18.5-22.6) | <b>0.7</b>                                          | (0.5-0.8) | <b>0.6</b> | (0.4-0.7) |
| Dementia                            | <b>0.8</b>                                      | (0.7-0.9) | <b>22.7</b> | (20.4-25.0) | <b>0.5</b>                                          | (0.3-0.6) | <b>0.4</b> | (0.3-0.5) |
| Heart failure                       | <b>0.7</b>                                      | (0.6-0.7) | <b>20.8</b> | (18.8-22.8) | <b>0.7</b>                                          | (0.6-0.9) | <b>0.6</b> | (0.5-0.8) |
| COPD                                | 0.9                                             | (0.8-1.0) | 25.3        | (23.4-27.2) | 1.2                                                 | (1.1-1.4) | 0.9        | (0.8-1.1) |
| Gastrointestinal disorder           | <b>1.2</b>                                      | (1.1-1.3) | <b>28.8</b> | (26.6-31.0) | 1.1                                                 | (0.9-1.4) | 0.9        | (0.7-1.1) |
| Cirrhosis                           | <b>1.2</b>                                      | (1.1-1.3) | <b>29.3</b> | (27.1-31.5) | <b>2.4</b>                                          | (1.9-3.0) | <b>1.8</b> | (1.4-2.2) |
| Chronic kidney disease              | <b>0.6</b>                                      | (0.5-0.7) | <b>19.1</b> | (16.9-21.2) | <b>0.5</b>                                          | (0.4-0.6) | <b>0.4</b> | (0.3-0.5) |
| Acute kidney injury                 | 0.9                                             | (0.8-1.0) | 24.8        | (22.6-27.1) | 1.2                                                 | (0.9-1.5) | 0.9        | (0.7-1.2) |
| Diabetes                            | <b>0.6</b>                                      | (0.5-0.6) | <b>19.7</b> | (18.0-21.4) | <b>0.5</b>                                          | (0.4-0.6) | <b>0.5</b> | (0.4-0.6) |
| Malignancy                          | <b>0.5</b>                                      | (0.4-0.5) | <b>17.0</b> | (15.2-18.7) | <b>0.6</b>                                          | (0.5-0.8) | <b>0.6</b> | (0.4-0.7) |
| Trauma                              | <b>1.2</b>                                      | (1.1-1.2) | <b>28.3</b> | (26.2-30.3) | 1.2                                                 | (1.1-1.4) | 1.0        | (0.8-1.1) |
| Pneumonia                           | <b>0.6</b>                                      | (0.6-0.7) | <b>20.2</b> | (18.2-22.2) | 0.8                                                 | (0.7-1.0) | 0.7        | (0.5-0.8) |
| Sepsis/shock                        | 0.9                                             | (0.8-1.0) | 24.4        | (22.2-26.6) | 1.1                                                 | (0.9-1.4) | 0.9        | (0.7-1.1) |
| Prior-year other SUDs <sup>b</sup>  | 0.9                                             | (0.9-1.0) | 25.9        | (24.0-27.8) | <b>2.1</b>                                          | (1.7-2.6) | <b>1.6</b> | (1.2-1.9) |
| <b>Prior-year MH diagnoses</b>      |                                                 |           |             |             |                                                     |           |            |           |
| Anxiety                             | 1.1                                             | (1.0-1.2) | 27.6        | (25.5-29.6) | 1.1                                                 | (0.9-1.3) | 0.9        | (0.7-1.1) |
| Depression                          | 1.0                                             | (0.9-1.1) | 26.5        | (24.6-28.4) | 0.9                                                 | (0.7-1.0) | 0.7        | (0.6-0.9) |
| PTSD                                | 0.9                                             | (0.9-1.0) | 25.7        | (23.8-27.6) | 1.0                                                 | (0.8-1.2) | 0.8        | (0.6-1.0) |
| Bipolar disorder                    | <b>0.8</b>                                      | (0.7-0.9) | <b>22.9</b> | (20.7-25.0) | <b>0.9</b>                                          | (0.7-1.3) | <b>0.8</b> | (0.5-1.0) |
| Psychotic disorder                  | <b>0.7</b>                                      | (0.6-0.8) | <b>20.9</b> | (18.9-22.8) | <b>0.9</b>                                          | (0.7-1.2) | <b>0.7</b> | (0.5-0.9) |
| <b>Prior-year outpatient care</b>   |                                                 |           |             |             |                                                     |           |            |           |
| Emergency Department care           | <b>0.9</b>                                      | (0.8-0.9) | <b>25.8</b> | (24.0-27.6) | <b>0.8</b>                                          | (0.7-0.9) | <b>0.7</b> | (0.6-0.8) |
| Primary care                        | <b>0.6</b>                                      | (0.5-0.6) | <b>25.6</b> | (23.8-27.4) | <b>0.6</b>                                          | (0.5-0.7) | <b>0.7</b> | (0.6-0.8) |
| Specialty Medical/Surgical care     | <b>0.6</b>                                      | (0.5-0.6) | <b>24.8</b> | (23.0-26.6) | <b>0.5</b>                                          | (0.4-0.6) | <b>0.7</b> | (0.6-0.8) |
| MH/SUD care                         | 1.0                                             | (0.9-1.1) | 26.5        | (24.7-28.4) | <b>0.7</b>                                          | (0.6-0.8) | <b>0.6</b> | (0.5-0.8) |
| <b>Prior-year inpatient care</b>    |                                                 |           |             |             |                                                     |           |            |           |
| Medical admission                   | <b>1.6</b>                                      | (1.5-1.7) | <b>30.5</b> | (28.5-32.6) | <b>0.6</b>                                          | (0.5-0.7) | <b>0.5</b> | (0.4-0.6) |
| Surgical admission                  | <b>0.6</b>                                      | (0.5-0.7) | <b>19.2</b> | (17.1-21.4) | 0.8                                                 | (0.6-1.0) | 0.6        | (0.4-0.8) |
| MH/SUD admission                    | <b>1.8</b>                                      | (1.6-1.9) | <b>24.5</b> | (22.1-26.9) | 0.8                                                 | (0.4-1.3) | 0.6        | (0.3-1.0) |

AWS = alcohol withdrawal syndrome, AUD = alcohol use disorder, OR = odds ratio, CI = confidence interval, Pred % = predicted probability, COPD = chronic obstructive pulmonary disease, MH = mental health, PTSD = post-traumatic stress disorder, SUD = substance use disorder, **Bold font** = statistically significant at the p < 0.001 level

<sup>a</sup> Adjusted for all patient demographics, diagnoses, and health services utilization covariates, with hospital facility as a random effect to account for covariance at the hospital level.

<sup>b</sup> Includes only drug use disorders
